# Supplementary material for: Using nomograms to predict prognostic factors in young colorectal mucinous and signet-ring cell adenocarcinoma patients
Source: PubMed Central journal article supplement (PMC6639454; doi:10.1042/bsr20181863), 2019-07-19

# overall survival

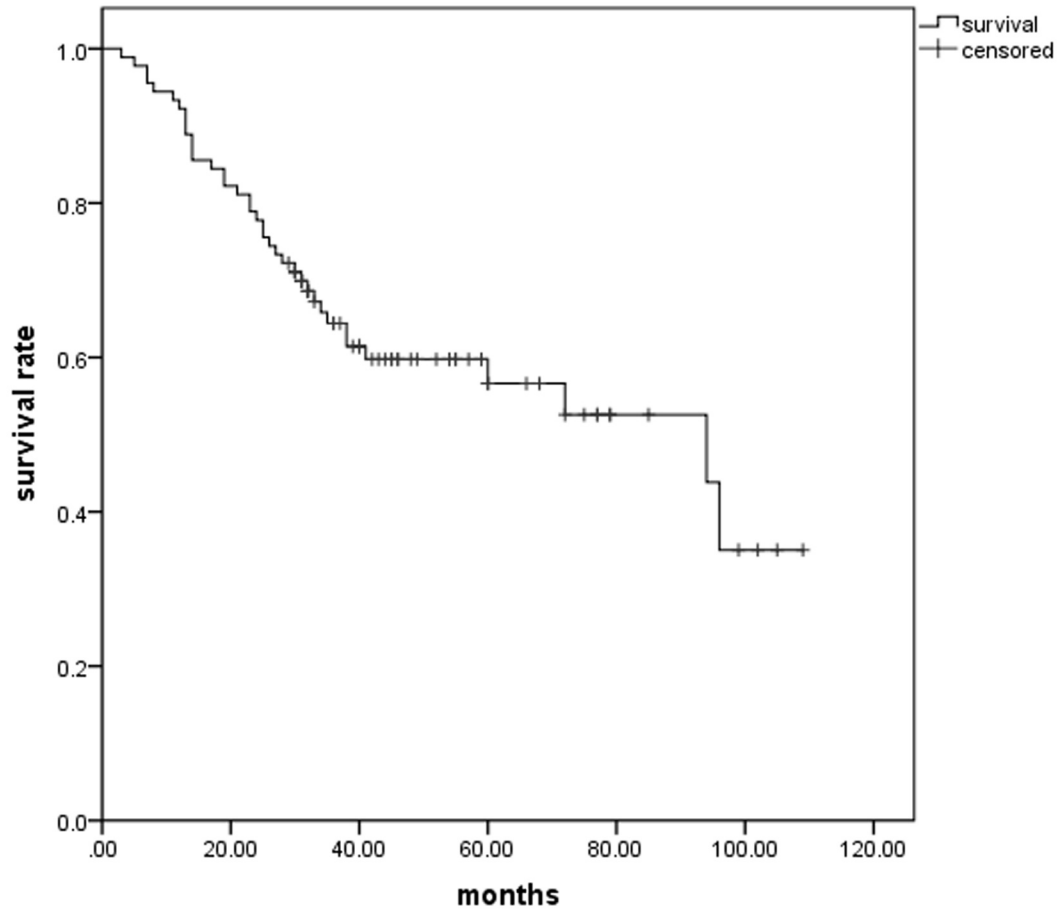

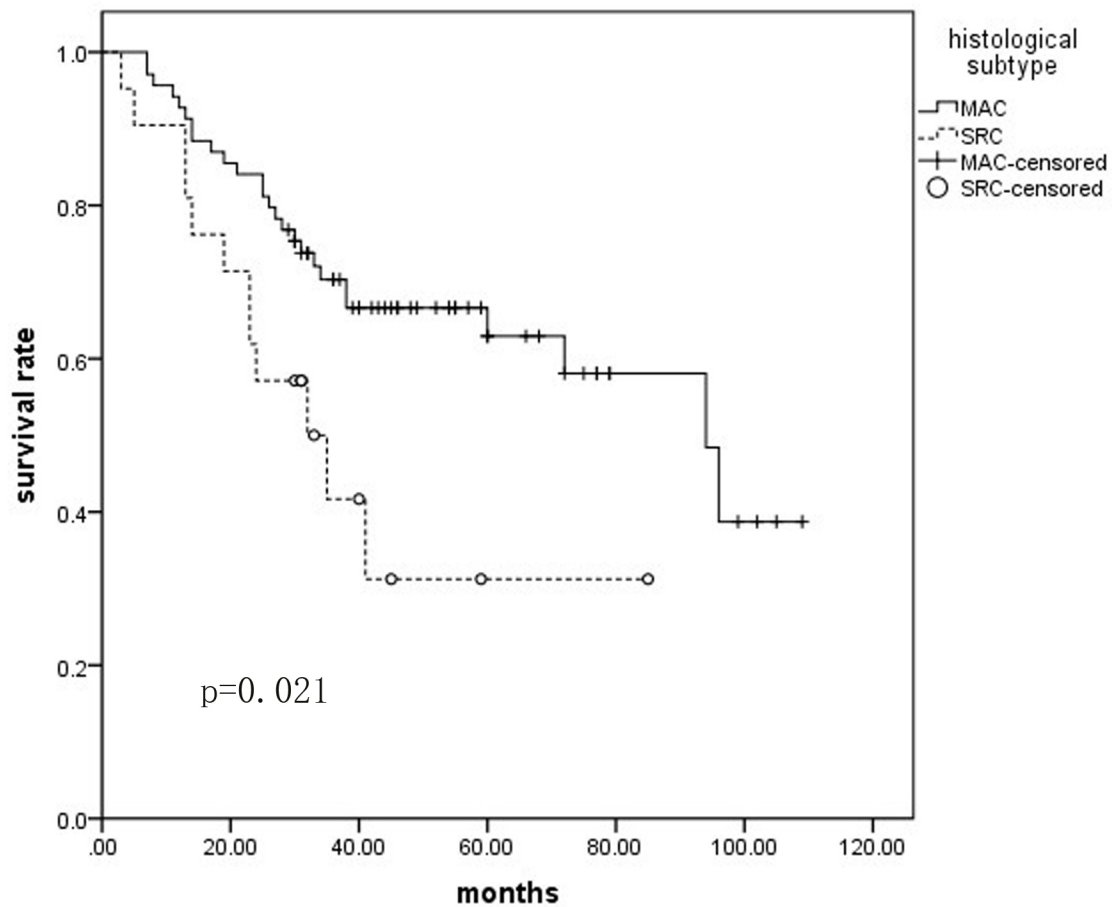

Supplement: bsr20181863_Supp1.pdf [file bsr20181863_Supp1.pdf]
